# Supplementary material for: Association of Acute Venous Thromboembolism With In‐Hospital Outcomes of Coronary Artery Bypass Graft Surgery
Source: PubMed Central journal article supplement — J Am Heart Assoc. 2019 Sep 19;8(19):e013246. doi: 10.1161/JAHA.119.013246 (PMC6806036; doi:10.1161/jaha.119.013246), 2019-09-19
Supplement: JAH3-8-e013246-s001.pdf [file JAH3-8-e013246-s001.pdf]

**SUPPLEMENTAL MATERIAL**

**Table S1. International Classification of Diseases, Ninth Edition, Clinical Modification (ICD-9-CM) codes used to identify study population.**

|                            |                                                                                                               |
|----------------------------|---------------------------------------------------------------------------------------------------------------|
| <b>Inclusion criteria</b>  |                                                                                                               |
| CABG                       | 36.1x                                                                                                         |
| Acute deep vein thrombosis | 451.11, 451.19, 451.83, 451.81, 453.40, 453.41, 453.42, 453.82, 453.84, 453.85, 453.86, 453.87, 453.89, 453.2 |
| Pulmonary embolism         | 415.1, 415.11, 415.13, 415.19                                                                                 |
| <b>Exclusion criteria</b>  |                                                                                                               |
| SAVR                       | 35.21, 35.22                                                                                                  |
| Aortic root procedures     | 38.44, 38.45                                                                                                  |
| Tricuspid valve procedures | 35.14, 35.27, 35.28                                                                                           |
| Pulmonic valve procedures  | 35.13, 35.25, 35.26                                                                                           |
| Mitral valve procedures    | 35.12, 35.23, 35.24                                                                                           |

CABG: coronary artery bypass grafting; SAVR: surgical aortic valve replacement

**Table S2. International Classification of Diseases, Ninth Edition, Clinical Modification (ICD-9-CM) or Clinical Classification Software (CCS) codes used to identify comorbidities.**

| <b>Comorbidity</b>                           |                          |
|----------------------------------------------|--------------------------|
| Hyperlipidemia                               | CCS 53                   |
| Prior history of VTE (including chronic VTE) | V12.51, 453.7X, , 453.5X |
| Smoking                                      | 305.1-305.13             |
| CPB use                                      | 39.61, 39.66             |

CCS: Clinical Classification Software; CPB: cardiopulmonary bypass; VTE: venous thromboembolism.

All other comorbidities in Table 1 were identified using the Elixhauser comorbidities included with the NIS.

**Table S3. International Classification of Diseases, Ninth Edition, Clinical Modification (ICD-9-CM) codes used to identify in-hospital complications.**

| <b>In-hospital complication</b> |                                                                                                                                                                                                                                                                                                                                                                                                                                                                                                                                                                                                                           |
|---------------------------------|---------------------------------------------------------------------------------------------------------------------------------------------------------------------------------------------------------------------------------------------------------------------------------------------------------------------------------------------------------------------------------------------------------------------------------------------------------------------------------------------------------------------------------------------------------------------------------------------------------------------------|
| Stroke                          | 997.01, 997.02, 431, 433.x1, 434.x1, 344.6x                                                                                                                                                                                                                                                                                                                                                                                                                                                                                                                                                                               |
| Acute Respiratory Failure       | 518.81 , 518.82, 518.84, 799.1, 786.09, 518.4, 518.51                                                                                                                                                                                                                                                                                                                                                                                                                                                                                                                                                                     |
| AKI                             | 584.5, 584.6, 584.7, 584.8, 584.9                                                                                                                                                                                                                                                                                                                                                                                                                                                                                                                                                                                         |
| AKI-D                           | 584.x + 39.95                                                                                                                                                                                                                                                                                                                                                                                                                                                                                                                                                                                                             |
| Bleeding                        | 430, 431, 432.x, 336, 362.43, 362.81, 363.61, 363.62, 363.72, 364.41, 3736.32, 377.42, 379.23; 423.0 + 37.0; 923.x + 729.71, 924.x + 729.72, 922.2-9 + 729.73; 456.0, 456.20, 530.7, 530.82, 531.00, 531.01, 531.20, 531.21, 531.40, 531.41, 31.60, 531.61, 532.00, 532.01, 532.20, 532.21, 532.40, 532.41, 532.60, 532.61, 533.00, 533.01, 533.20, 533.21, 533.40, 533.41, 533.60, 533.61, 534.00, 534.01, 534.20, 534.21, 534.40, 534.41, 534.60, 534.61, 569.3, 578.0, 578.1, 578.9, 568.81, 599.70, 599.71, 719.1x, 784.7, 784.8, 459, 998.11, 998.12, 285.1 + 998.00, 998.09, 785.50, 785.59, 276.52 + 00.17 + 99.0x |

AKI: acute kidney injury; AKI-D: AKI requiring dialysis

**Table S4. Multivariable analysis of in-hospital outcomes, in PE and DVT-only groups.**

| <b>Outcome</b>               | <b>No PE</b> | <b>PE</b>          | <b>P value</b> | <b>No DVT</b> | <b>DVT-only</b>  | <b>P value</b> |
|------------------------------|--------------|--------------------|----------------|---------------|------------------|----------------|
| <b>In-hospital mortality</b> |              |                    |                |               |                  |                |
| Incidence (%)                | 1.8          | 10.0               |                | 1.8           | 5.6              |                |
| Unadjusted OR [95% CI]       | Ref          | 6.17 [4.04-9.42]   | <0.001         | Ref           | 3.32[2.33-4.75]  | <0.001         |
| Adjusted OR [95% CI] *       | Ref          | 3.46 [2.07 - 5.78] | <0.001         | Ref           | 1.43 [0.96-2.13] | 0.08           |
| <b>AKI</b>                   |              |                    |                |               |                  |                |
| Incidence (%)                | 16.5         | 33.2               |                | 16.3          | 41.8             |                |
| Unadjusted OR [95% CI]       | Ref          | 2.51 [1.93-3.27]   | <0.001         | Ref           | 3.68[3.11-4.36]  | <0.001         |
| Adjusted OR [95% CI] *       | Ref          | 1.83 [1.34-2.50]   | <0.001         | Ref           | 2.43 [1.95-3.02] | <0.001         |
| <b>AKI-D</b>                 |              |                    |                |               |                  |                |
| Incidence (%)                | 1.2          | 2.9                |                | 1.2           | 4.3              |                |

| <b>Outcome</b>                   | <b>No PE</b> | <b>PE</b>          | <b>P value</b> | <b>No DVT</b> | <b>DVT-only</b>    | <b>P value</b> |
|----------------------------------|--------------|--------------------|----------------|---------------|--------------------|----------------|
| Unadjusted OR [95% CI]           | Ref          | 2.48 [1.17-5.27]   | <0.001         | Ref           | 3.76[2.46-5.74]    | <0.001         |
| Adjusted OR [95% CI] *           | Ref          | 1.89 [0.80-4.47]   | 0.14           | Ref           | 1.52 [0.92 – 2.53] | 0.12           |
| <b>Acute Respiratory Failure</b> |              |                    |                |               |                    |                |
| Incidence (%)                    | 17.3         | 45.2               |                |               |                    |                |
| Unadjusted OR [95% CI]           | Ref          | 3.96 [3.10-5.05]   | <0.001         | Ref           | 4.03 [3.43-4.73]   | <0.001         |
| Adjusted OR [95% CI] *           | Ref          | 2.93 [2.26-3.80]   | <0.001         | Ref           | 2.63 [2.20- 3.14]  | <0.001         |
| <b>Stroke</b>                    |              |                    |                |               |                    |                |
| Incidence (%)                    | 1.8          | 2.5                | 1.8            | 8.5           |                    |                |
| Unadjusted OR [95% CI]           | Ref          | 1.37 [0.61-3.08]   | 0.52           | Ref           | 5.15 [3.80-6.98]   | <0.001         |
| Adjusted OR [95% CI] *           | Ref          | 0.97 [0.42 – 2.21] | 0.94           | Ref           | 3.18 [2.25 – 4.50] | <0.001         |

| <b>Outcome</b>                 | <b>No PE</b> | <b>PE</b>        | <b>P value</b> | <b>No DVT</b> | <b>DVT-only</b>    | <b>P value</b> |
|--------------------------------|--------------|------------------|----------------|---------------|--------------------|----------------|
| <b>Bleeding</b>                |              |                  |                |               |                    |                |
| Incidence (%)                  | 6.6          | 19.1             | 6.5            | 17.7          |                    |                |
| Unadjusted OR [95% CI]         | Ref          | 3.34 [2.38-4.70] | <0.001         | Ref           | 3.07 [2.47 – 3.78] | <0.001         |
| Adjusted OR [95% CI] *         | Ref          | 2.49 [1.74-3.56] | <0.001         | Ref           | 2.06 [1.65 – 2.58] | <0.001         |
| <b>Length of stay</b>          |              |                  |                |               |                    |                |
| Days ± SE                      | 8.58 ± 0.01  | 17.09 ± 0.31     |                | 8.55 ± 0.01   | 16.80 ± 0.10       |                |
| Unadjusted parameter estimate† | Ref          | 1.99[1.84-2.15]  | <0.001         | Ref           | 2.01 [1.92-2.11]   | <0.001         |
| Adjusted parameter estimate*†  | Ref          | 1.77[1.64-1.90]  | <0.001         | Ref           | 1.67[1.60-1.75]    | <0.001         |
| <b>Average hospital cost</b>   |              |                  |                |               |                    |                |

| <b>Outcome</b>                 | <b>No PE</b> | <b>PE</b>        | <b>P value</b> | <b>No DVT</b> | <b>DVT-only</b>  | <b>P value</b> |
|--------------------------------|--------------|------------------|----------------|---------------|------------------|----------------|
| Mean ± SE (\$)                 | 46,073 ± 52  | 74,563 ± 1528    | -              | 45,936 ± 52   | 78,401 ± 1068    | -              |
| Unadjusted parameter estimate† | Ref          | 1.62 [1.49-1.77] | <0.001         | Ref           | 1.71[1.60-1.82]  | <0.001         |
| Adjusted parameter estimate*†  | Ref          | 1.47[1.35-1.60]  | <0.001         | Ref           | 1.46 [1.38-1.55] | <0.001         |

PE: pulmonary embolism; DVT: deep vein thrombosis; AKI: acute kidney injury; AKI-D: AKI requiring dialysis; OR: odds ratio; SE: standard error

\*Adjusted for age, race, sex, insurance status, hospital characteristics, and all comorbidities listed in Table 1.

†Parameter estimates represent the antilog of the  $\beta$  regression coefficients obtained from the log-transformed regression models.



**Table S5. Association of OPCAB with in-hospital mortality.**

| Mortality          | Unadjusted OR [95% CI] | Adjusted OR [95% CI] | P value <sup>‡</sup> |
|--------------------|------------------------|----------------------|----------------------|
| Overall mortality* | 1.25 [1.09 – 1.44]     | 1.16 [1.00 – 1.34]   | 0.05                 |
| In VTE group †     | 1.72 [0.96 – 3.07]     | 1.78 [0.90 – 3.53]   | 0.10                 |
| In non-VTE group † | 1.23 [1.06 – 1.41]     | 1.15 [0.99 – 1.33]   | 0.08                 |

OPCAB: off-pump coronary artery bypass grafting; OR: odds ratio; VTE: venous thromboembolism.

\*Adjusted for age, race, sex, insurance status, VTE status, hospital characteristics, and all comorbidities listed in Table 1.

† Adjusted for age, race, sex, insurance status, hospital characteristics, and all comorbidities listed in Table 1.

‡ P values provided for adjusted analyses.

**Table S6. In-hospital mortality in patients undergoing CABG with and without VTE (excluding OPCAB cases).**

|                                        | No VTE | VTE                | P value |
|----------------------------------------|--------|--------------------|---------|
| Incidence of in-hospital mortality (%) | 1.7    | 5.9                | -       |
| Unadjusted OR [95% CI]                 | Ref    | 3.73 [2.67 – 5.21] | <0.001  |
| Adjusted OR [95% CI]*                  | Ref    | 1.87 [1.29 – 2.71] | 0.001   |

CABG: coronary artery bypass grafting; OPCAB: off-pump coronary artery bypass grafting; OR: odds ratio; VTE: venous thromboembolism.

\*Adjusted for age, race, sex, insurance status, hospital characteristics and all comorbidities listed in Table 1.
